# Supplementary material
Source: Research Square preprint supplement (doi:10.21203/rs.3.rs-9897696/v1)
Supplement: Supplementary file 1 [file 26ebf81c44579136bedfd3a7.docx]

| **Table 3. Freezing sub-types according to a Predictive Processing framework** |
| --- |
| *Festination:* Festination is a progressive quickening of steps leading to motor arrest(130). Here, according to a Predictive Processing framework, the brain attempts to minimise accumulation of prediction error by progressively increasing the frequency of corrective motor commands leading to a rapid succession of steps. This perception of accumulating error is consistent with the theme of Rhythm Changers (Figure 2, part C). Festination, however, also carries the unique characteristic of a concurrent forward propulsion of the centre of mass. From a Predictive Processing perspective, this can be rationalised as the system maintaining a strong high-level prediction for forward progression (i.e. “I should keep moving forward”) that is not constrained by sensory input from the quickening steps. This can be characterised as a mismatch between overly precise high-level predictions — preserved due to their generation in cortical networks that are less vulnerable to dopamine depletion—and imprecise bottom-up sensory feedback and prediction errors. |
| *Turning:* Extending the above rationale (i.e. the concept of overly precise predictions being coupled with imprecise sensory input) to FOG-provoking turning actions, we might expect to periodically observe over-rotation of body segments in conjunction with progressively smaller and quicker steps. However, regarding axial rotations, observations in the literature indicate the opposite, with people with Parkinson’s and FOG adopting a more *en bloc* movement strategy(131) combined with reduced movement variability(132). The reason for this apparent contrast between festination and turning actions may lie in the distinction between neural architectures responsible for regulating each respective action. Compared to the control of forward walking, turning relies to a greater extent on vestibular, visual and axial proprioceptive inputs that appear to retain higher precision in people with Parkinson’s relative to distal limb proprioception(133), thereby generating critical prediction errors if segmental rotation becomes excessive. Furthermore, unlike the continuous cyclical task of forward walking, turning on the spot might be characterised as a sequence of discrete actions, with each step requiring a planned reorientation of each segment. Unless turning actions break down to a point where knee-trembling is evident(134), this relative segmentation of each step made within the turn could also serve to constrain the progressive accumulation of ‘runaway’ errors as observed in rhythmic repetitive tasks such as forward gait as well as upper-limb tapping tasks(135). |
| *Destination freezes:* Navigating complex and changing environments require a walker to update high level sensorimotor predictions so that motor output can be adapted accordingly. As above, breakdown in the updating of sensorimotor predictions impairs action selection and associated adaptability of motor performance(53). As a given motor task progresses (e.g. the distance to a doorway reduces) the need for sensory-driven revisions to internal models increases, creating a need for rapid re-evaluation of different potential motor plans. Problems with this policy selection could lead to transient periods where motor output is withheld, resulting in motor arrest/FOG(136). |
| *Start hesitations:* People living with Parkinson’s and FOG often experience a temporary, involuntary inability to initiate gait(137). During gait initiation, anticipatory postural adjustments (APAs) are often hypometric in people with FOG pathology(30,138,139), potentially contributing to instability and increased incidence of failed attempts to step(30). This impaired modulation can be interpreted as failure to generate sufficient precision in sensorimotor predictions and periodically down-weight sensory signals to permit the execution of predicted movement. The role of dopamine in influencing these processes is evidenced through the partial restoration of APAs following Levodopa intake(138). Researchers developing step-initiation training based on conscious replacement of defective APAs have observed people intuitively adopting rhythmic preparatory actions including repetitive weight shifting and ancillary movements, including the upper limbs, head and trunk(30,122,124). Much like a golfer shuffling prior to taking a shot, we argue that these preparatory actions can be interpreted as an attempt to minimise uncertainty by acting on the world to sample sensory evidence about body position/movement and environmental constraints(140). This input is then used to increase the precision of sensorimotor predictions. The rhythmic preparatory actions described here therefore represent a form of self-generative temporal scaffolding (Figure 2, part B) serving to stabilise gait-related top-down predictions(141) and facilitate the selection of an action plan under conditions of impaired precision control that we collectively characterise as Rhythm Changers (Figure 2, part C). |
