# Supplementary material
Source: Research Square preprint supplement (doi:10.21203/rs.3.rs-9897696/v1)
Supplement: Supplementary file 3 [file 7be846431b25862eccd030e6.docx]

**Table 1.** *Participant Characteristics*

|  |  |  |  |  |  |  |
| --- | --- | --- | --- | --- | --- | --- |
| Participant | Sex | Age (years) | Years diagnosed | MOCA  (0-30) | FOGQ  (0-24) | UPDRS-III  (0-108) |
| 1 | F | 69 | 8 | 28 | 16 | 17 |
| 2 | M | 73 | 13 | 23 | 16 | 22 |
| 3 | F | 57 | 12 | 25 | 13 | 20 |
| 4 | F | 55 | 8 | 30 | 11 | 24 |
| 5 | M | 75 | 5 | 24 | 22 | 16 |
| 6 | F | 74 | 14 | 26 | 16 | 21 |
| 7 | F | 55 | 12 | 27 | 15 | 18 |
| 8 | M | 61 | 15 | 29 | 14 | 19 |
| 9 | M | 59 | 4 | 27 | 17 | 17 |
| 10 | M | 66 | 7 | 26 | 17 | 16 |
| 11 | F | 53 | 3 | 28 | 13 | 24 |
| 12 | F | 66 | 9 | 27 | 14 | 19 |
| 13 | F | 69 | 8 | 27 | 16 | 31 |
| 14 | F | 68 | 26 | 26 | 9 | 17 |
| 15 | M | 68 | 7 | 28 | 17 | 18 |
| 16 | M | 41 | 2 | 30 | 16 | 16 |
| 17 | M | 68 | 9 | 30 | 15 | 12 |
| 18 | M | 71 | 9 | 25 | 16 | 29 |
| 19 | F | 48 | 3 | 30 | 11 | 29 |
| *20(inaudible)* | *M* | *75* | *15* | *24* | *22* | *28* |
| 21 | M | 84 | 4 | 28 | 14 | 13 |
| 22 | F | 71 | 3 | 27 | 16 | 23 |
| 23 | M | 78 | 12 | 28 | 17 | 18 |
| 24 | F | 67 | 3 | 26 | 17 | 19 |
| 25 | M | 48 | 25 | 25 | 17 | 20 |
| 26 | F | 67 | 3 | 30 | 16 | 30 |
| 27 | M | 81 | 10 | 29 | 17 | 25 |
| 28 | M | 81 | 8 | 28 | 10 | 25 |
| 29 | M | 77 | 4 | 30 | 10 | 24 |
| 30 | M | 71 | 6 | 25 | 23 | 26 |
| 31 | F | 72 | 22 | 27 | 20 | 25 |
| 32 | M | 82 | 3 | 28 | 15 | 20 |
| 33 | M | 71 | 2 | 26 | 19 | 15 |
| 34 | F | 61 | 20 | 28 | 13 | 24 |
| 35 | M | 79 | 2 | 27 | 20 | 19 |
