# Supplementary material
Source: Research Square preprint supplement (doi:10.21203/rs.3.rs-9897696/v1)
Supplement: Supplementary file 4 [file dffa881ee7ac3420242d1b63.docx]

| **Table 2. Description of key concepts related to Predictive Processing** |
| --- |
| *Sensorimotor predictions and movement:* Predictive processing accounts propose that movement arises from precise sensorimotor predictions. Here, the brain generates predictions about the sensory consequences of movement; when these predictions are precise, the resulting prediction errors are resolved not by updating beliefs, but instead by generating the motor commands required to align sensory input with the predicted state |
| *Precision weighting:* Perception reflects a balance between top-down predictions and bottom-up sensory input, with the resulting percept determined by the relative *precision* (i.e. confidence) afforded to each, as well as the degree to which prediction errors (the discrepancy between predicted and actual sensory input) are weighted. |
| *Precision weighted towards predictions:* When predictions are highly precise (e.g. when processing stable and predictable environments), this can increase efficiency, in part by suppressing expected or noisy sensory signals to prevent system overload. However, assigning high precision to predictions can also dominate perception, even in the presence of contradictory sensory information, accounting for classic perceptual illusions (e.g. Müller-Lyer, Rubber hand(126)), as well as Parkinson’s-related hallucinations(127) and delusions(128). |
| *Precision weighted towards sensory input:* When predictions are imprecise and sensory input is afforded high precision, perception is driven primarily by incoming sensory evidence(46,70,129). This often permits crucial updating of predictions in unpredictable environments. However, it also increases reactivity to noise and weakens the influence of (potentially useful) prior knowledge, thereby potentially reducing perceptual stability(53). |
